# Supplementary material
Source: Springer Nature journal article supplement (https://www.springermedizin.de/resource/supplementary/12992_2013_306_MOESM1_ESM.pdf/9616196)
Supplement: MOESM1 [file 9616196]

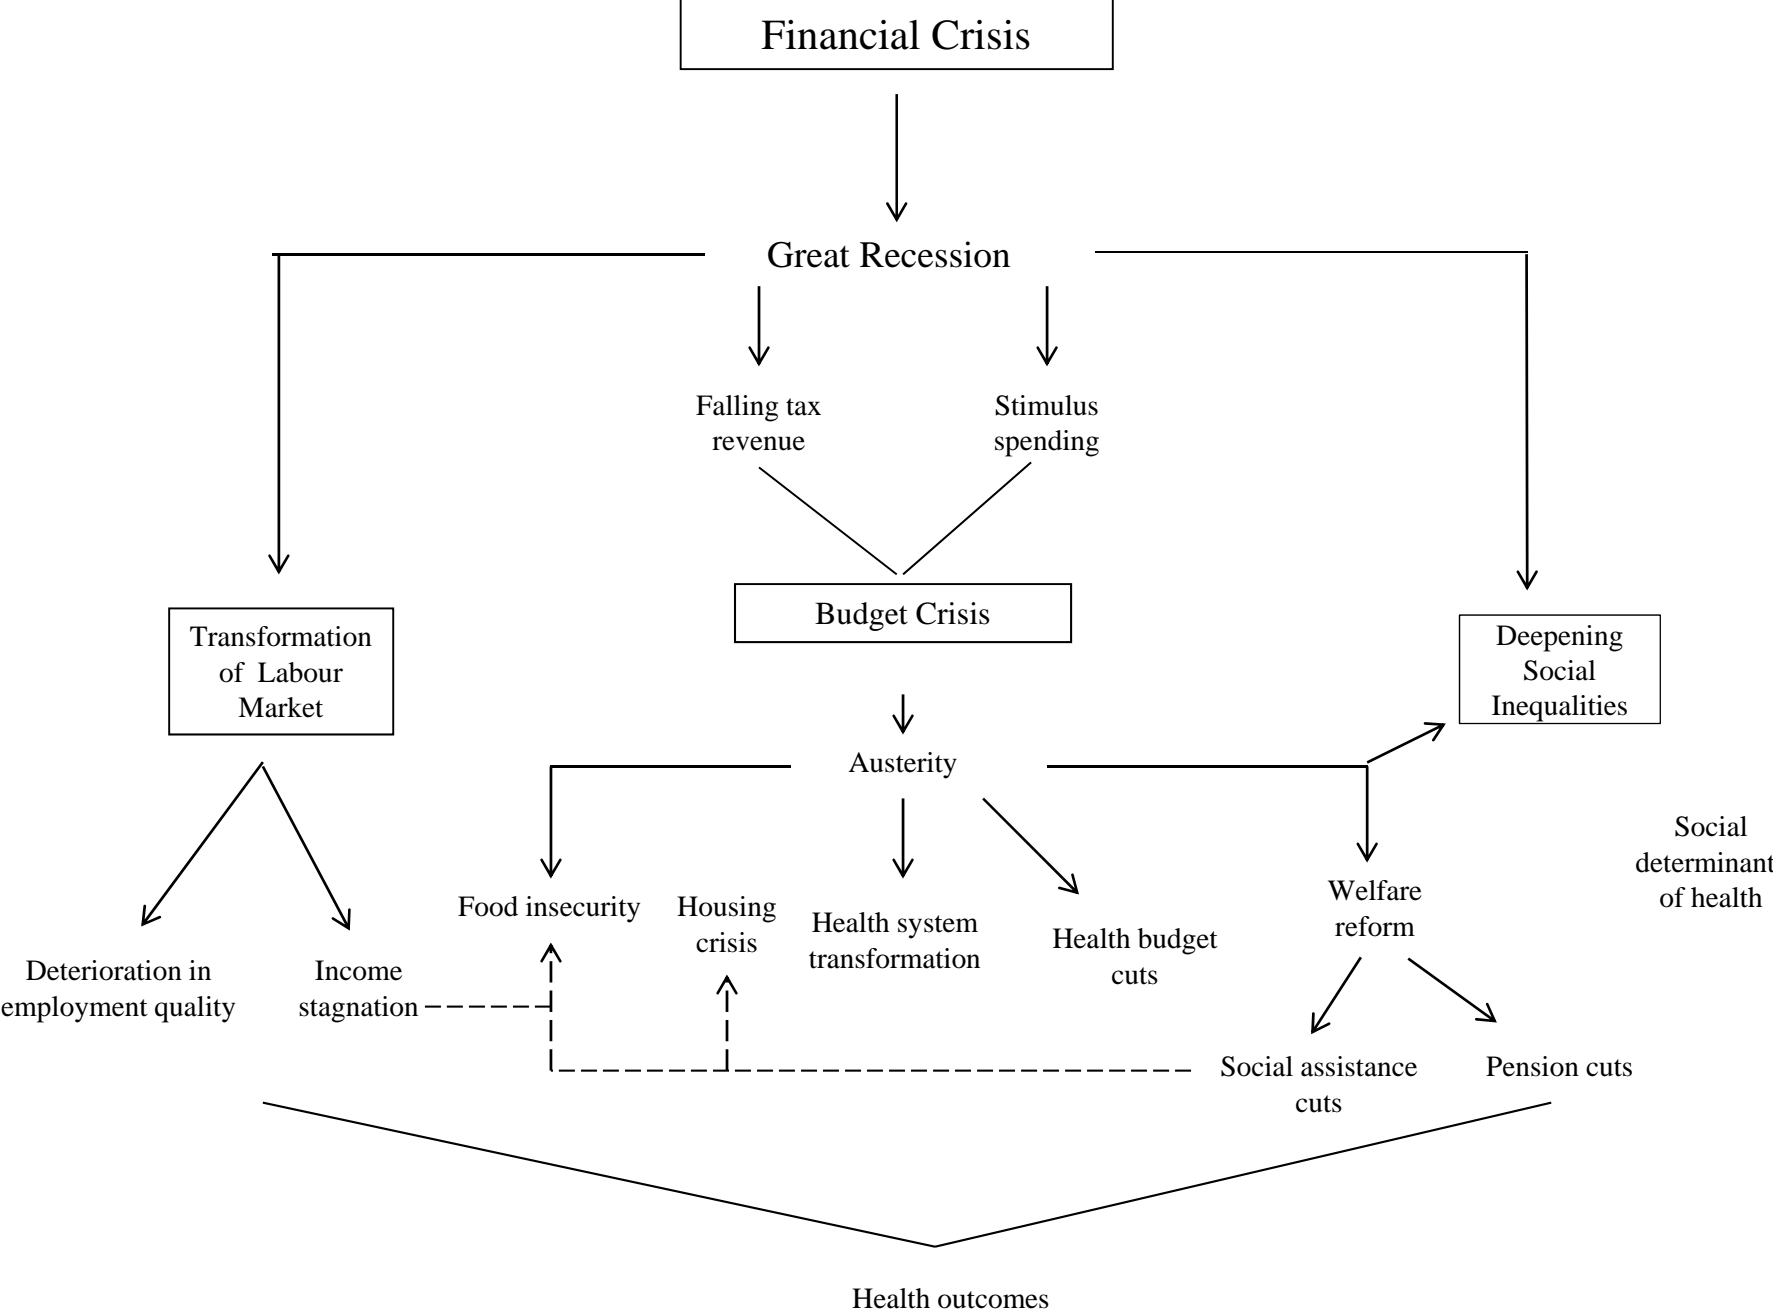

Financial Crisis

Great Recession

Falling tax revenue

Stimulus spending

Budget Crisis

Transformation of Labour Market

Deepening Social Inequalities

Austerity

Food insecurity

Housing crisis

Health system transformation

Health budget cuts

Welfare reform

Social assistance cuts

Pension cuts

Deterioration in employment quality

Income stagnation

Social determinants of health

Health outcomes
